# Supplementary material for: Mapping Problematic Drinking Trends over Time in Urban, Semi-Urban, and Rural Populations
Source: MDPI journal article supplement (doi:10.3390/ijerph19010589), 2022-01-05
Supplement: s1 [file s1]

**Table S1.** Characteristics of the participants NDSHS (2004–2016).

|                                          | 2004            | 2007            | 2010            | 2013            | 2016           |
|------------------------------------------|-----------------|-----------------|-----------------|-----------------|----------------|
| <i>N</i>                                 | 28,582          | 22,912          | 26,157          | 23,521          | 23,425         |
|                                          | Weighted % CI * | Weighted %CI * |
| <b>Sex</b>                               |                 |                 |                 |                 |                |
| Male                                     | 49.2            | 49.4            | 49.5            | 49.5            | 49.4           |
| Female                                   | 50.8            | 50.7            | 50.5            | 50.5            | 50.6           |
| <b>Age groups<br/>(years)</b>            |                 |                 |                 |                 |                |
| 18–24                                    | 12.6            | 12.6            | 12.6            | 12.0            | 11.8           |
| 25–29                                    | 7.8             | 7.6             | 8.6             | 9.0             | 8.7            |
| 30–39                                    | 18.0            | 17.4            | 17.3            | 16.8            | 17.1           |
| 40–49                                    | 18.1            | 17.6            | 17.2            | 16.9            | 16.3           |
| 50–59                                    | 15.4            | 15.5            | 15.2            | 15.5            | 15.2           |
| 60–69                                    | 11.8            | 13.0            | 11.3            | 12.0            | 12.6           |
| 70+                                      | 9.6             | 9.7             | 11.3            | 11.8            | 12.6           |
| <b>Mental Health<br/>Status</b>          |                 |                 |                 |                 |                |
| Well                                     | 84.9            | 85.4            | 85.2            | 84.9            | 83.0           |
| Mild                                     | 9.0             | 8.8             | 8.8             | 8.3             | 9.0            |
| Moderate                                 | 3.7             | 3.6             | 3.5             | 3.7             | 4.5            |
| Severe                                   | 2.4             | 2.2             | 2.6             | 3.1             | 3.5            |
| <b>Heavy Episodic<br/>Drinking: **</b>   |                 |                 |                 |                 |                |
| No                                       | 63.6            | 64.4            | 65.1            | 67.1            | 68.2           |
| Yes                                      | 36.4            | 35.6            | 34.9            | 32.9            | 31.8           |
| <b>Long-term Risky<br/>Drinking: ***</b> |                 |                 |                 |                 |                |
| No                                       | 80.2            | 80.5            | 80.1            | 82.0            | 83.1           |
| Yes                                      | 19.8            | 19.5            | 20.0            | 18.0            | 17.0           |
| <b>Location</b>                          |                 |                 |                 |                 |                |
| Urban                                    | 67.6            | 67.7            | 68.4            | 71.2            | 70.0           |
| Semi-urban                               | 21.0            | 20.4            | 20.5            | 17.0            | 18.9           |
| Rural                                    | 11.5            | 11.9            | 11.1            | 11.8            | 11.0           |

Notes: \* Sample counts are unweighted and all proportions are based on weighted data. \*\* Heavy episodic drinking is characterised as having 5+ standard drinks on an occasion in the last 12 months. \*\*\* Long-term risky drinking is characterised as having 2+ standard drinks per day in the last 12 months
